# Supplementary material for: Evidence for the Growth Superiority and Delayed Ovarian Development in Tetraploid Loach Misgurnus anguillicaudatus
Source: MDPI journal article supplement (doi:10.3390/fishes7060322), 2022-11-08
Supplement: s1 [file s1]

Table S2. The summary of sequencing data of the RNA-seq libraries

| Tissue    | Sample | Total Reads<br>Num | Clean Reads Num (%) | Read<br>length | Error(%) | Q20 (%) | Q30 (%) | Poy A (%) | N (%) |
|-----------|--------|--------------------|---------------------|----------------|----------|---------|---------|-----------|-------|
| Brain     | B_2n_1 | 53,666,522         | 53,214,084 (99.16%) | 150+150        | 0.0235   | 98.63%  | 95.62%  | 0 (%)     | 0 (%) |
|           | B_2n_2 | 60,230,172         | 59,752,370 (99.21%) | 150+150        | 0.0234   | 98.68%  | 95.76%  | 0 (%)     | 0 (%) |
|           | B_2n_3 | 47,046,838         | 46,720,340 (99.31%) | 150+150        | 0.025    | 98.02%  | 94.14%  | 0 (%)     | 0 (%) |
|           | B_4n_1 | 60,131,002         | 59,666,940 (99.23%) | 150+150        | 0.0234   | 98.68%  | 95.76%  | 0 (%)     | 0 (%) |
|           | B_4n_2 | 61,976,034         | 61,510,268 (99.25%) | 150+150        | 0.0235   | 98.64%  | 95.65%  | 0 (%)     | 0 (%) |
|           | B_4n_3 | 54,987,112         | 54,650,678 (99.39%) | 150+150        | 0.0247   | 98.15%  | 94.45%  | 0 (%)     | 0 (%) |
| Pituitary | P_2n_1 | 63,519,282         | 62,983,914 (99.16%) | 150+150        | 0.0237   | 98.57%  | 95.44%  | 0 (%)     | 0 (%) |
|           | P_2n_2 | 61,205,380         | 60,711,700 (99.19%) | 150+150        | 0.0236   | 98.61%  | 95.55%  | 0 (%)     | 0 (%) |
|           | P_2n_3 | 52,226,802         | 51,927,292 (99.43%) | 150+150        | 0.0247   | 98.17%  | 94.47%  | 0 (%)     | 0 (%) |
|           | P_4n_1 | 57,889,848         | 57,423,446 (99.19%) | 150+150        | 0.0238   | 98.51%  | 95.29%  | 0 (%)     | 0 (%) |
|           | P_4n_2 | 61,964,290         | 61,458,744 (99.18%) | 150+150        | 0.0238   | 98.52%  | 95.33%  | 0 (%)     | 0 (%) |
|           | P_4n_3 | 50,259,670         | 49,918,032 (99.32%) | 150+150        | 0.0254   | 97.87%  | 93.73%  | 0 (%)     | 0 (%) |
| Liver     | L_2n_1 | 50,770,048         | 50,312,850 (99.1%)  | 150+150        | 0.023    | 98.82%  | 96.18%  | 0 (%)     | 0 (%) |
|           | L_2n_2 | 47,175,672         | 46,743,436 (99.08%) | 150+150        | 0.023    | 98.82%  | 96.16%  | 0 (%)     | 0 (%) |
|           | L_2n_3 | 46,544,954         | 46,182,534 (99.22%) | 150+150        | 0.0242   | 98.34%  | 94.99%  | 0 (%)     | 0 (%) |
|           | L_4n_1 | 47,033,868         | 46,500,166 (98.87%) | 150+150        | 0.0234   | 98.66%  | 95.84%  | 0 (%)     | 0 (%) |
|           | L_4n_2 | 54,280,626         | 53,770,538 (99.06%) | 150+150        | 0.0234   | 98.67%  | 95.74%  | 0 (%)     | 0 (%) |
|           | L_4n_3 | 44,129,642         | 43,753,232 (99.15%) | 150+150        | 0.0249   | 98.03%  | 94.22%  | 0 (%)     | 0 (%) |
| Gonad     | G_2n_1 | 55,802,642         | 55,350,016 (99.19%) | 150+150        | 0.0234   | 98.65%  | 95.81%  | 0 (%)     | 0 (%) |
|           | G_2n_2 | 47,167,862         | 46,579,812 (98.75%) | 150+150        | 0.0256   | 97.78%  | 93.55%  | 0 (%)     | 0 (%) |
|           | G_2n_3 | 51,271,350         | 51,017,518 (99.5%)  | 150+150        | 0.0235   | 98.61%  | 95.66%  | 0 (%)     | 0 (%) |

|        |        |            |                     |         |        |        |        |       |       |
|--------|--------|------------|---------------------|---------|--------|--------|--------|-------|-------|
|        | G_4n_1 | 57,260,906 | 56,787,584 (99.17%) | 150+150 | 0.0237 | 98.54% | 95.51% | 0 (%) | 0 (%) |
|        | G_4n_2 | 55,414,214 | 54,977,526 (99.21%) | 150+150 | 0.0236 | 98.59% | 95.61% | 0 (%) | 0 (%) |
|        | G_4n_3 | 56,362,546 | 56,078,074 (99.5%)  | 150+150 | 0.0235 | 98.62% | 95.71% | 0 (%) | 0 (%) |
| Muscle | M_2n_1 | 58,791,986 | 58,337,770 (99.23%) | 150+150 | 0.0232 | 98.75% | 95.97% | 0 (%) | 0 (%) |
|        | M_2n_2 | 59,212,158 | 58,770,884 (99.25%) | 150+150 | 0.0232 | 98.75% | 95.95% | 0 (%) | 0 (%) |
|        | M_2n_3 | 59,138,598 | 58,762,086 (99.36%) | 150+150 | 0.0244 | 98.27% | 94.8%  | 0 (%) | 0 (%) |
|        | M_4n_1 | 59,258,210 | 58,836,926 (99.29%) | 150+150 | 0.0231 | 98.8%  | 96.09% | 0 (%) | 0 (%) |
|        | M_4n_2 | 49,468,120 | 49,104,572 (99.27%) | 150+150 | 0.0232 | 98.75% | 95.94% | 0 (%) | 0 (%) |
|        | M_4n_3 | 47,120,224 | 46,836,642 (99.4%)  | 150+150 | 0.0247 | 98.13% | 94.44% | 0 (%) | 0 (%) |
