# Supplementary material for: Evidence for the Growth Superiority and Delayed Ovarian Development in Tetraploid Loach Misgurnus anguillicaudatus
Source: MDPI journal article supplement (doi:10.3390/fishes7060322), 2022-11-08
Supplement: s1 [file s1]

Table S1. The information of the primers for RT-qPCR

| Gene annotation                                                     | Gene symbol                  | Forward               | Reverse                  | Amplicon size (bp) |
|---------------------------------------------------------------------|------------------------------|-----------------------|--------------------------|--------------------|
| brain aromatase                                                     | <i>cyp19a1b</i>              | ATTGCTCGGGTTTGGAT     | GGTAGCGTTGACGGATA        | 255                |
| somatolactin alpha                                                  | <i>sl<math>\alpha</math></i> | CCACAGCAAGTCCTTCCCAA  | GCAAATACACCAGCGGTTCG     | 122                |
| estrogen receptor beta 2                                            | <i>er<math>\beta</math>2</i> | CTGATGTTGGGACTGATGTG  | GAAGGATCATGGCTTTGAGG     | 202                |
| luteinizing hormone-beta                                            | <i>lh<math>\beta</math></i>  | TATTCTGTTTAGTTGTCATGC | AAAGTACCTTTGTTAGACAG     | 159                |
| follicle-stimulating hormone beta                                   | <i>fsh<math>\beta</math></i> | GCTGTATCACAATCGACACC  | GGTGAAAACAGAGTCAACC<br>C | 170                |
| Prolactin                                                           | <i>prl</i>                   | TCTCTACTGCTTGCGTGGTC  | CGCTCCAAACCTGCTTCCAA     | 143                |
| estrogen receptor beta 1                                            | <i>er</i>                    | CTGATGTTGGGACTGATGTG  | GAAGGATCATGGCTTTGAGG     | 202                |
| vitellogenin 2                                                      | <i>vtg2</i>                  | TGAATGAGAAAGTCGCTGCA  | GCAGAGTAGTAGCCGCAGTT     | 270                |
| vitellogenin 4                                                      | <i>vtg4</i>                  | GACCGCAGCCTTGCCAAATC  | AGCCAGGTCAGAATGTCCTC     | 156                |
| vitellogenin C                                                      | <i>vtgC</i>                  | CAGGACAACTCCCTCAGCTT  | AGAGCTTTCTTTCCCTGCGG     | 218                |
| NADH dehydrogenase [ubiquinone] 1 beta subcomplex subunit 5         | <i>ndufb5</i>                | TGTTGCACGCACAGAACAAG  | CCAACGAGTGATGGGATGCT     | 253                |
| NADH dehydrogenase [ubiquinone] 1 beta subcomplex subunit 9         | <i>ndufb9</i>                | TGAAAGCCACCCTAATGTTG  | TGATGAGCACACATACCTCT     | 252                |
| succinate dehydrogenase cytochrome b560 subunit, mitochondrial-like | <i>sdh3</i>                  | GTTTCACCCCATGTAAGCAT  | AGAACCATAGACTTGCGGTA     | 300                |
| cytochrome c oxidase subunit 6A, mitochondrial-like                 | <i>cox 6</i>                 | TTTCAGTGCATCCGTAAAGA  | CACCACGAACGACAATATCT     | 148                |

|                                                                     |               |                               |                               |     |
|---------------------------------------------------------------------|---------------|-------------------------------|-------------------------------|-----|
| cytochrome c oxidase subunit 7A-related protein, mitochondrial-like | <i>cox7α</i>  | GCAGTCCACTACATGGGAAT          | GCTCATTGTGGTCCTATACA          | 126 |
| cytochrome c oxidase assembly protein COX15 homolog                 | <i>cox 15</i> | TCCTTCCCAAAAATGGGCGA          | AGCGATGTGGGAACGTAAC<br>A      | 275 |
| ATP synthase subunit alpha                                          | <i>atp1</i>   | CGGATTCGTGTCCAAAAATG          | AATCTTCTCCTCCAGAATGC          | 121 |
| ATP synthase                                                        | <i>atp4</i>   | TGTCGAGATTGGTGTTTGTT          | CAGCAAATGTCTCGTGATTG          | 288 |
| low-density lipoprotein receptor-related protein 4                  | <i>lrp-4</i>  | TGTTTCACCATCATCGAACT          | GACAACGTCAGCAAAGTAA<br>G      | 239 |
| low-density lipoprotein receptor-related protein 12 isoform X1      | <i>lrp-12</i> | GGCTTCCAGTGGTGTAATAA          | TGTCATCAGAGTGGAAC TTG         | 272 |
| ryanodine receptor 3                                                | <i>RyR3</i>   | TGCAGTGTGTGGCGTCTATT          | TTTTGGCGAGCATCTCCTGT          | 189 |
| Troponin I, slow skeletal muscle                                    | <i>TnI</i>    | CCCTAAGAAGGGTGAGGGTCT         | ACAGACTTGAGGTTGCTCT<br>C      | 100 |
| troponin C, skeletal muscle                                         | <i>TnC</i>    | GATGCTTGCCGAGTTTAAGGC         | CTGACCCAGCATCCTCATCA<br>C     | 103 |
| elongation factor 1-α                                               | <i>ef1α</i>   | CTGGAGACAGCAAGAACGACC<br>CACC | GGCAATCCAGCACTGGAGC<br>ATAGCC | 114 |
