# Supplementary material for: Evidence for the Growth Superiority and Delayed Ovarian Development in Tetraploid Loach Misgurnus anguillicaudatus
Source: MDPI journal article supplement (doi:10.3390/fishes7060322), 2022-11-08
Supplement: s1 [file s1]

The supplementary figures for

Evidence for the Growth Superiority and Delayed Ovarian Development in Tetraploid Loach

*Misgurnus anguillicaudatus*

Xiaoyun Zhou <sup>1</sup>, Zexia Gao <sup>1</sup>, Shuangshuang Luo <sup>1</sup>, Junxiao Su <sup>1</sup>, Shaokui Yi <sup>2\*</sup>

1 College of Fisheries, Huazhong Agricultural University, Wuhan 430070, China

2 College of Life Sciences, Huzhou University, Huzhou 313000, China

\* Corresponding author: S. Yi

Email: 02844@zjhu.edu.cn

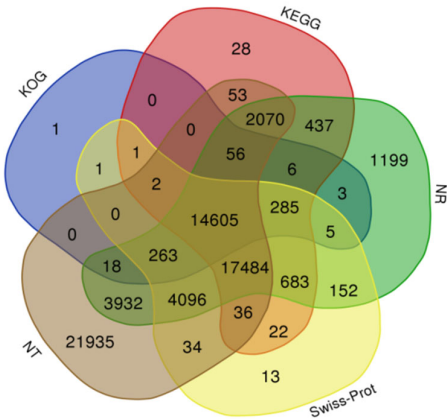

Figure S1. The annotation results of the unigenes with five public protein databases

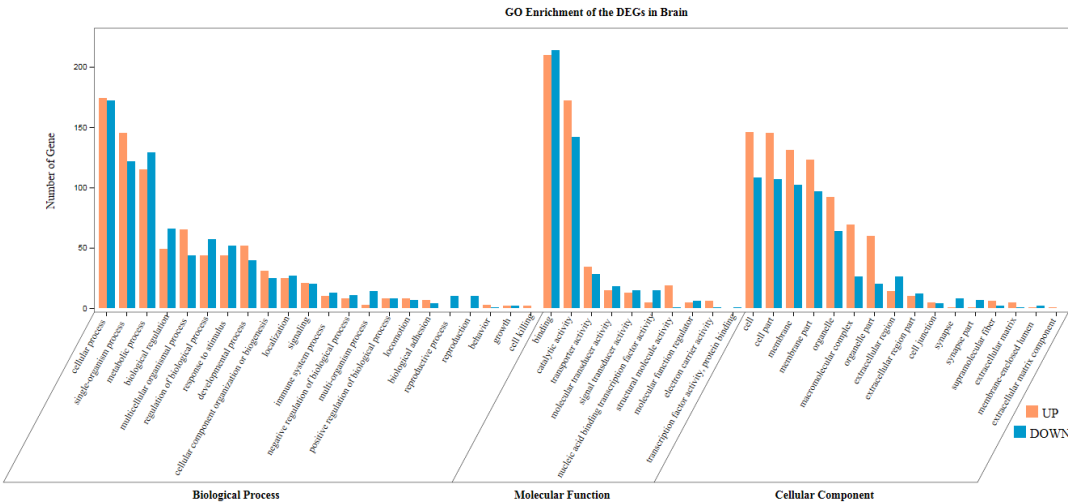

Top 20 of GO Enrichment of the DEGs in Brain

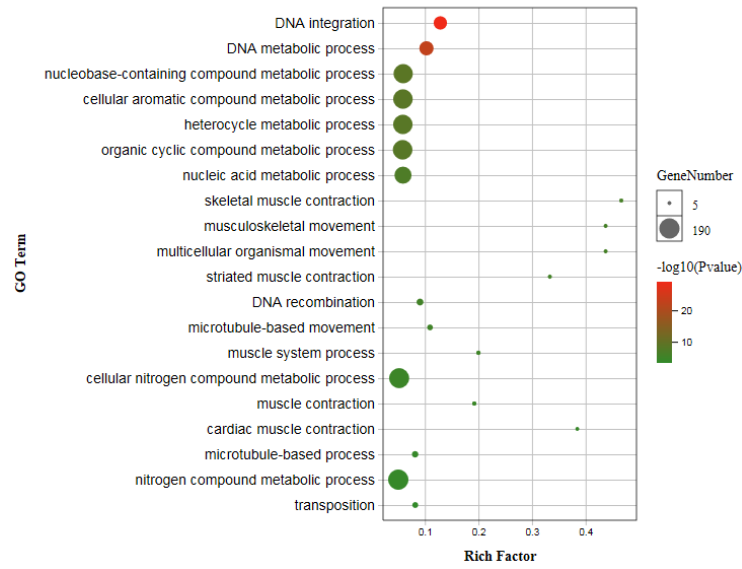

GO Enrichment of the DEGs in Pituitary

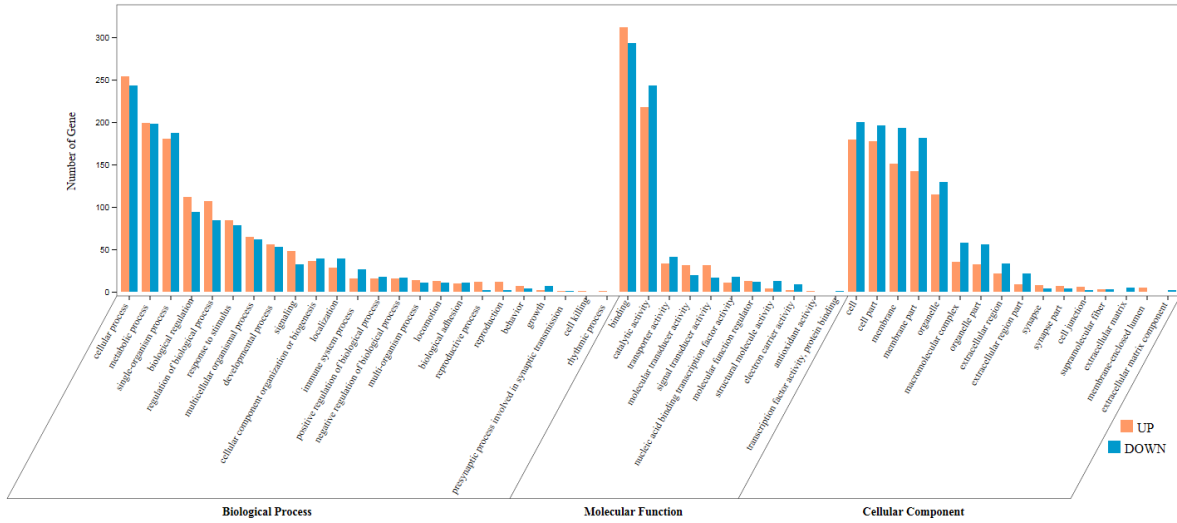

Top 20 of GO Enrichment of the DEGs in Pituitary

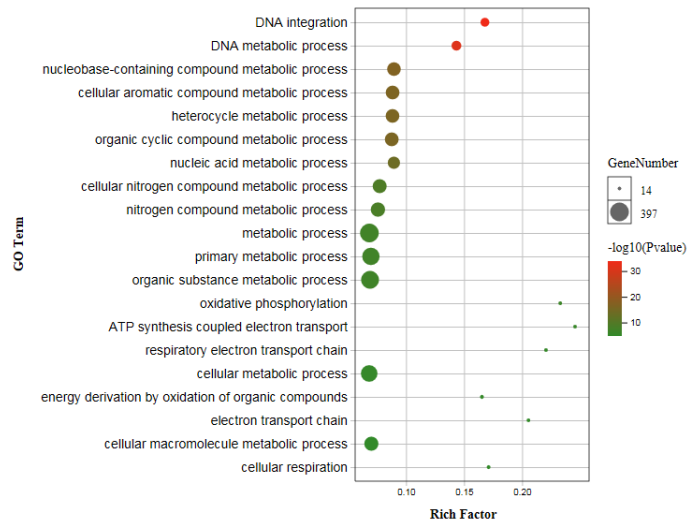



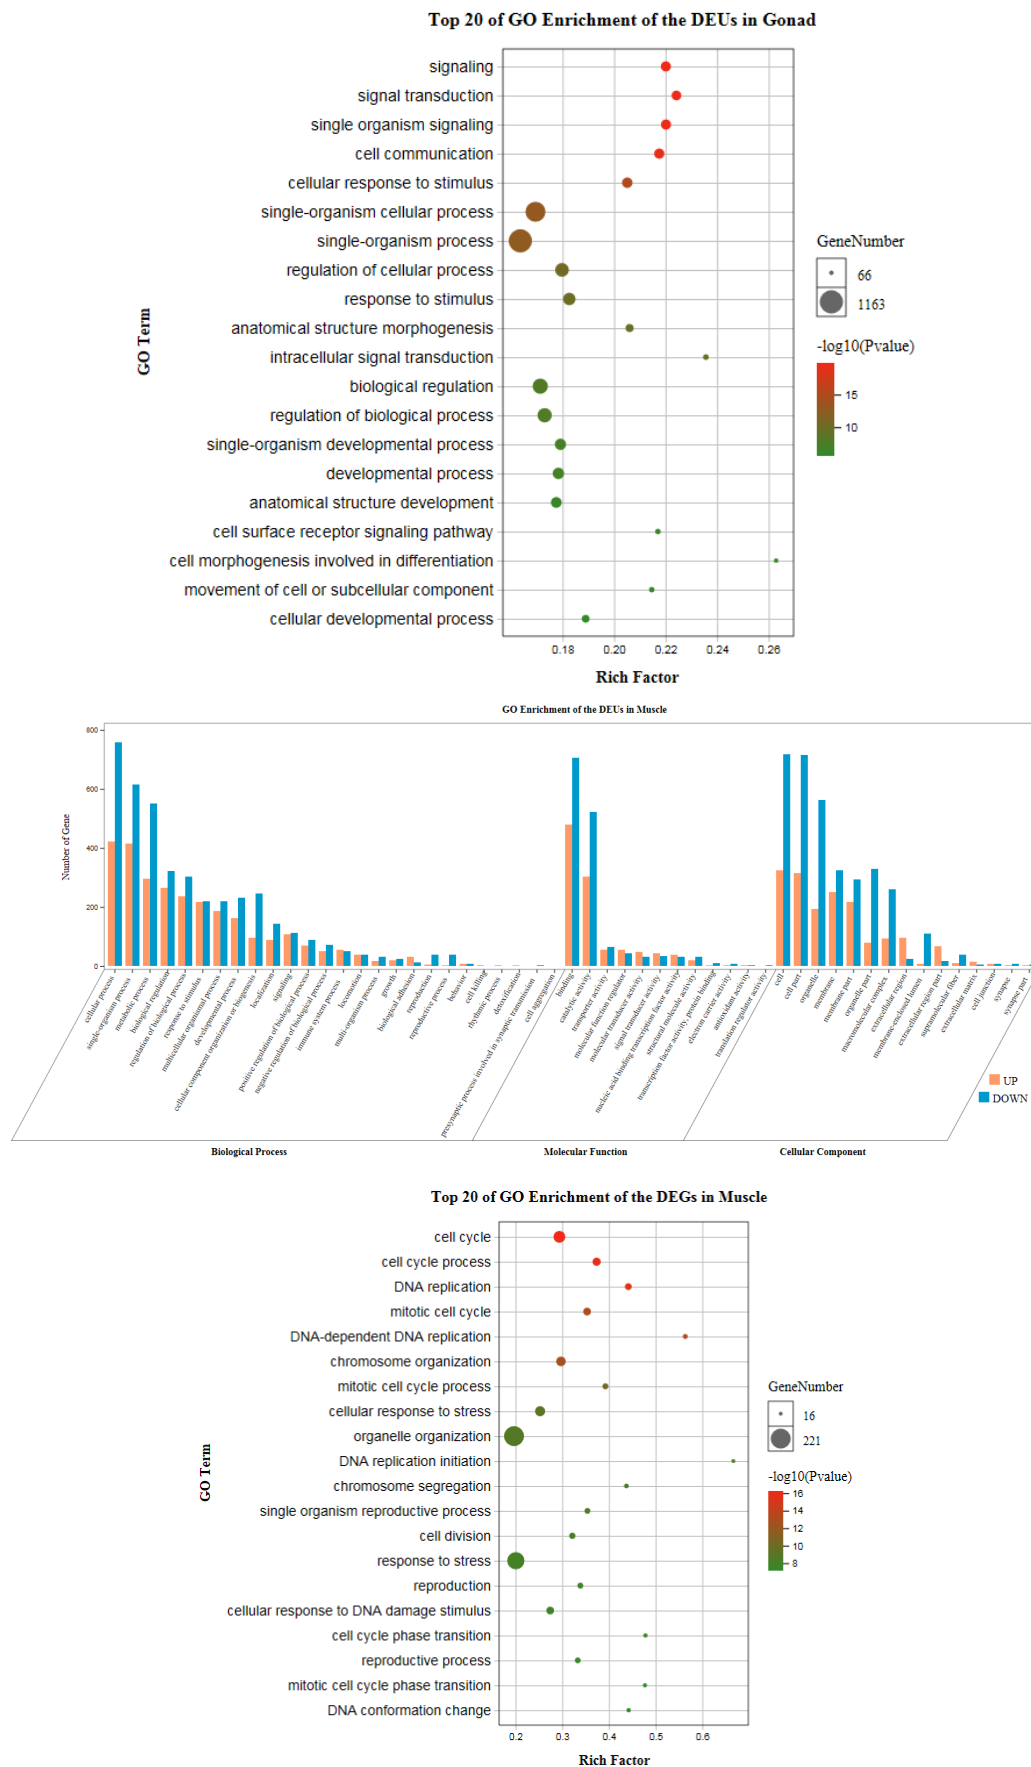

Figure S2. The GO and KEGG enrichment of the differentially expressed genes in brain, pituitary, liver, gonad and muscle between diploids and tetraploids
